# Supplementary material for: New 3,5-bis(3,4-dicarboxyphenoxy)benzoic acid-appended Mn(ii) coordination polymers: synthesis, characterization and antibiotic photodegradation properties
Source: Royal Society of Chemistry journal article supplement (doi:10.1039/d3ce01285a), 2024-01-01
Supplement: d3ce01285a1.pdf [file d3ce01285a1.pdf]

## Electronic Supporting Information

### New 3,5-bis(3,4-dicarboxyphenoxy)benzoic acid appended Mn(II) coordination polymers: Synthesis, Characterization and Antibiotic Photodegradation properties

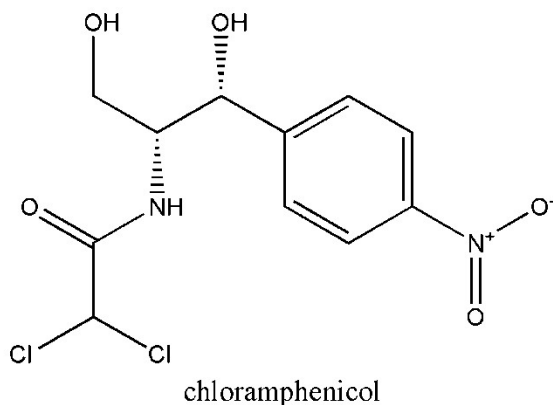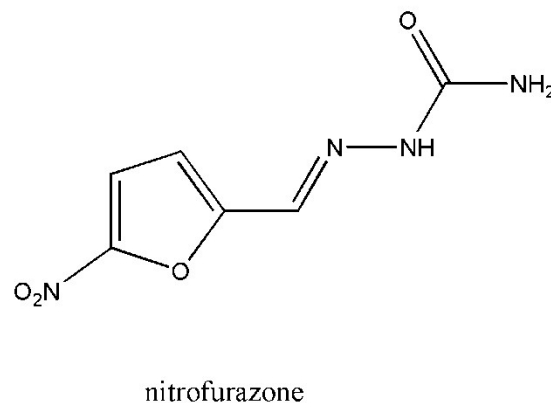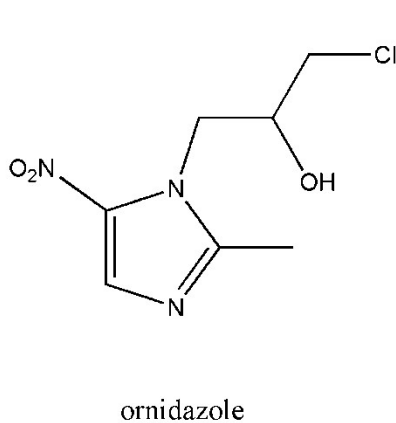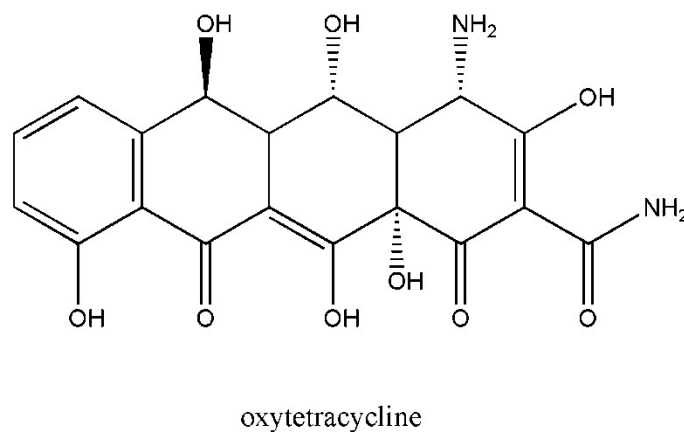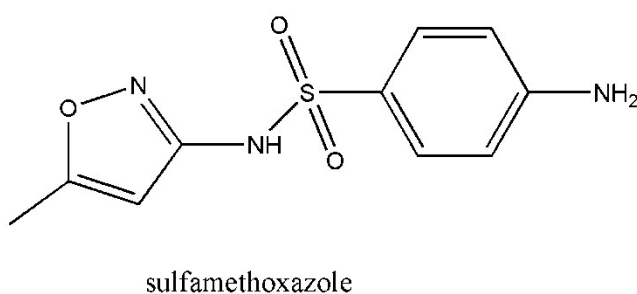

Scheme S1 the backbone of the antibiotics pollutants of chloramphenicol (CAP), nitrofurazone (NFZ), ornidazole (ODZ), oxytetracycline (OXY), and sulfamethoxazole (SMT).

## Electronic Supporting Information

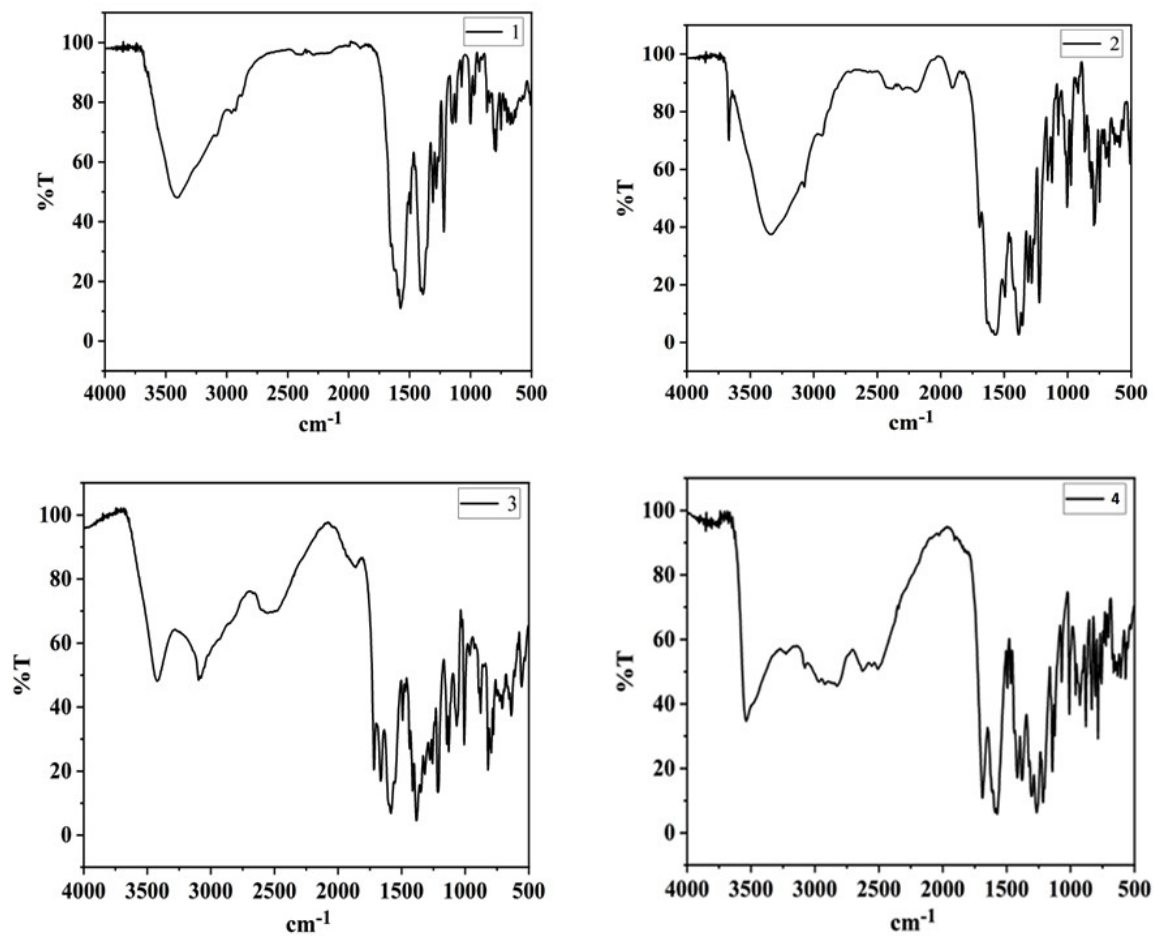

Figure S1 FT-IR spectra of CPs 1-4

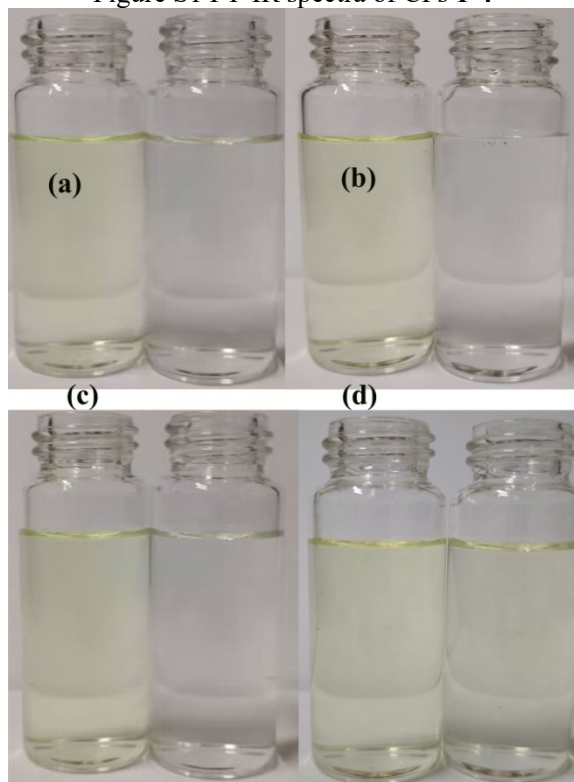

Fig. S2 The photographs of the compound before and after exposed to the analytes under UV light

## Electronic Supporting Information

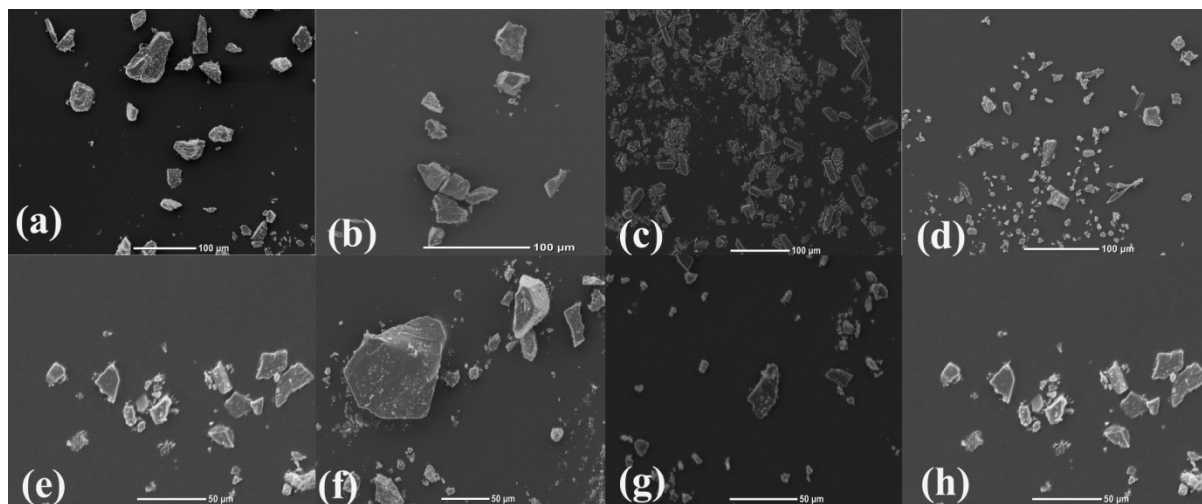

Fig. S3 the SEM images of each coordination polymer before and after photodegradation of NFZ for CPs 1-4

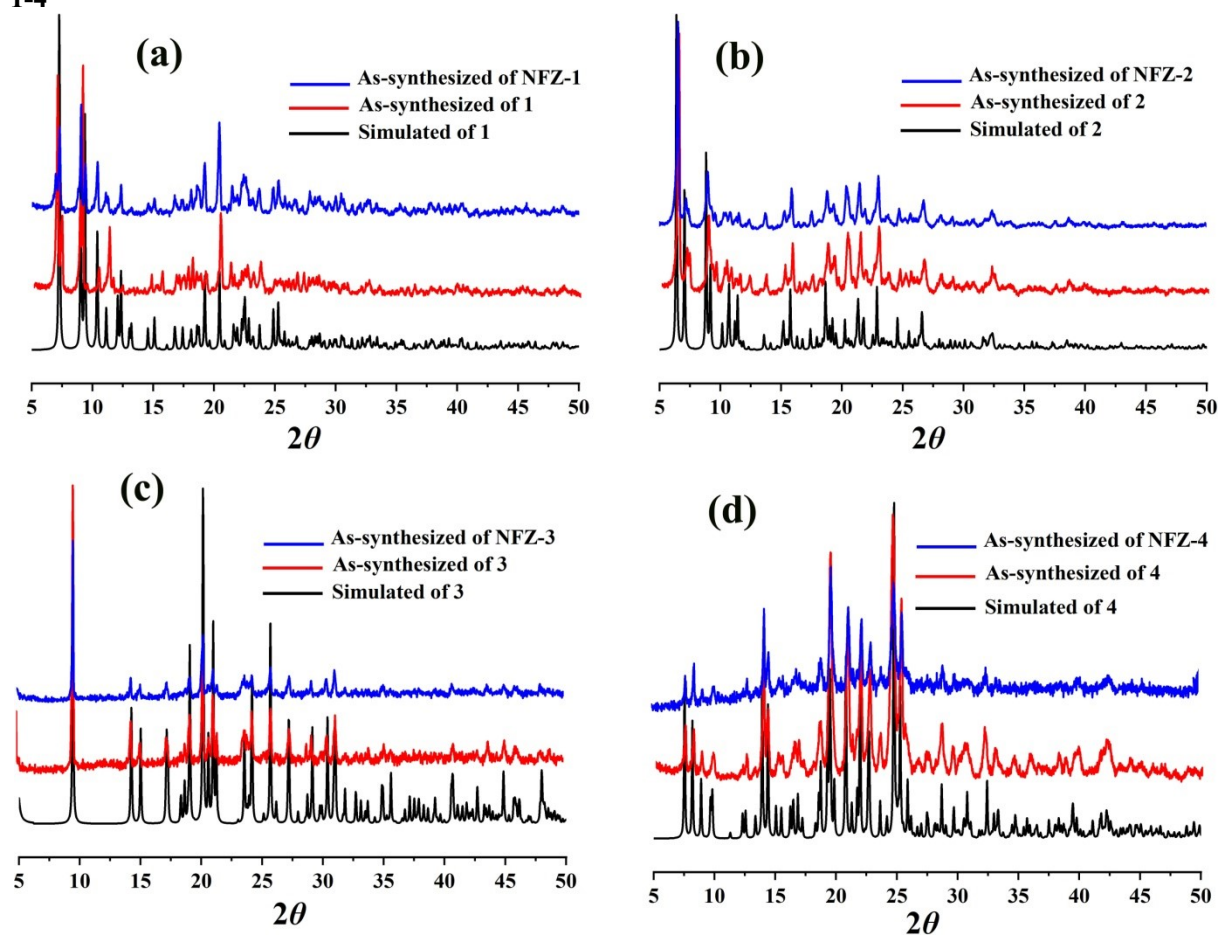

Fig. S4 the PXRD of each coordination polymer before and after photodegradation of NFZ for CPs 1-4

## Electronic Supporting Information

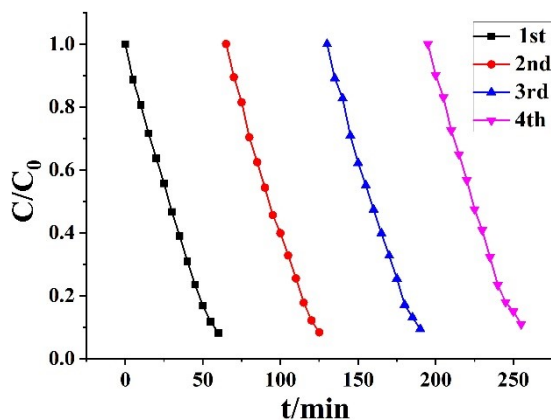

Fig. S5 Results of the photocatalytic recycles for CP 2 against the photodegradation of NFZ antibiotic.

**Table S1. Crystallographic data and structure refinement details for CPs 1 and 2**

| Parameter                                    | <b>1</b>                  | <b>2</b>                    |
|----------------------------------------------|---------------------------|-----------------------------|
| Formula                                      | $C_{28}H_{23}Mn_2NO_{15}$ | $C_{31}H_{30}Mn_2N_2O_{15}$ |
| Formula weight                               | 723.35                    | 954.69                      |
| Crystal system                               | Monoclinic                | Monoclinic                  |
| Space group                                  | $P21/c$                   | $P21/c$                     |
| Crystal Color                                | Colourless                | Colourless                  |
| $a, \text{Å}$                                | 10.1417(2)                | 14.081(4)                   |
| $b, \text{Å}$                                | 18.8610(3)                | 19.265(5)                   |
| $c, \text{Å}$                                | 16.4838(2)                | 16.785(5)                   |
| $\alpha, ^\circ$                             | 90                        | 90                          |
| $\beta, ^\circ$                              | 105.408(2)                | 100.610(6)                  |
| $\gamma, ^\circ$                             | 90                        | 90                          |
| $V, \text{Å}^3$                              | 3039.74(9)                | 4475(2)                     |
| $Z$                                          | 4                         | 4                           |
| $\rho_{\text{calAg}}, \text{g/cm}^3$         | 1.581                     | 1.417                       |
| $\mu, \text{mm}^{-1}$                        | 7.430                     | 0.639                       |
| $F(000)$                                     | 1472                      | 1984                        |
| $\theta$ Range, deg                          | 3.6-76.1                  | 1.5-27.8                    |
| Reflection Collected                         | 19316                     | 25375                       |
| Independent reflections ( $R_{\text{int}}$ ) | 0.047                     | 0.073                       |

## Electronic Supporting Information

|                                   |                |                |
|-----------------------------------|----------------|----------------|
| Reflections with $I > 2\sigma(I)$ | 5215           | 5183           |
| Number of parameters              | 437            | 573            |
| $R_1, wR_2 (I > 2\sigma(I))^*$    | 0.0805, 0.2342 | 0.0653, 0.1522 |
| $R_1, wR_2$ (all data)**          | 0.0892, 0.2419 | 0.1413, 0.1871 |

**Table S2. Crystallographic data and structure refinement details for CPs 3 and 4**

| Parameter                                    | <b>3</b>               | <b>4</b>                  |
|----------------------------------------------|------------------------|---------------------------|
| Formula                                      | $C_{23}H_{16}MnO_{14}$ | $C_{33}H_{22}MnN_2O_{13}$ |
| Formula weight                               | 571.30                 | 709.46                    |
| Crystal system                               | Monoclinic             | Triclinic                 |
| Space group                                  | $P2/c$                 | $P-1$                     |
| Crystal Color                                | Colorless              | Yellow                    |
| $a, \text{Å}$                                | 19.1708(8)             | 11.2767(4)                |
| $b, \text{Å}$                                | 6.2123(3)              | 11.9402(4)                |
| $c, \text{Å}$                                | 9.5258(5)              | 12.4311(4)                |
| $\alpha, ^\circ$                             | 90                     | 96.076(3)                 |
| $\beta, ^\circ$                              | 102.172(4)             | 104.603(3)                |
| $\gamma, ^\circ$                             | 90                     | 111.886(3)                |
| $V, \text{Å}^3$                              | 1108.97(9)             | 1465.30(10)               |
| $Z$                                          | 2                      | 2                         |
| $\rho_{\text{calAg}}, \text{g/cm}^3$         | 1.711                  | 1.608                     |
| $\mu, \text{mm}^{-1}$                        | 0.676                  | 4.351                     |
| $F(000)$                                     | 582                    | 726                       |
| $\theta$ Range, deg                          | 3.3-30.3               | 4.1-76.2                  |
| Reflection Collected                         | 11811                  | 17701                     |
| Independent reflections ( $R_{\text{int}}$ ) | 0.045                  | 0.050                     |
| Reflections with $I > 2\sigma(I)$            | 2732                   | 4994                      |
| Number of parameters                         | 213                    | 446                       |
| $R_1, wR_2 (I > 2\sigma(I))^*$               | 0.0389, 0.0987         | 0.0494, 0.1318            |
| $R_1, wR_2$ (all data)**                     | 0.0505, 0.1052         | 0.0559, 0.1363            |

## Electronic Supporting Information

$$* R = \sum(F_o - F_c) / \sum(F_o), \quad ** wR_2 = \{\sum[w(F_o^2 - F_c^2)^2] / \sum(F_o^2)\}^{1/2}.$$

**Table S3.** Selected bond distances (Å) and angles (deg) for **1-4**

|                      |            |                      |            |
|----------------------|------------|----------------------|------------|
| <b>1</b>             |            |                      |            |
| Mn(1)-O(1)           | 2.112(4)   | Mn(1)-O(13)          | 2.165(5)   |
| Mn(1)-O(14)          | 2.219(4)   | Mn(1)-O(6)#1         | 2.226(4)   |
| Mn(1)-O(4)#2         | 2.204(4)   | Mn(1)-O(9)#2         | 2.179(4)   |
| Mn(2)-O(2)           | 2.108(4)   | Mn(2)-O(15)          | 2.141(5)   |
| Mn(2)-O(5)#1         | 2.160(4)   | Mn(2)-O(10)#1        | 2.211(3)   |
| Mn(2)-O(4)#2         | 2.196(3)   | Mn(2)-O(6)#2         | 2.317(4)   |
| <b>2</b>             |            |                      |            |
| Mn(1)-O(1)           | 2.101(3)   | Mn(1)-O(13)          | 2.131(3)   |
| Mn(1)-O(5)#1         | 2.182(3)   | Mn(1)-O(10)#1        | 2.176(3)   |
| Mn(1)-O(4)#2         | 2.215(3)   | Mn(1)-O(6)#2         | 2.283(3)   |
| Mn(2)-O(2)           | 2.128(3)   | Mn(2)-O(14)          | 2.171(4)   |
| Mn(2)-O(17)          | 2.174(3)   | Mn(2)-O(6)#1         | 2.229(3)   |
| Mn(2)-O(4)#2         | 2.200(3)   | Mn(2)-O(9)#2         | 2.215(3)   |
| <b>3</b>             |            |                      |            |
| Mn1-O(1)             | 2.1499(14) | Mn(1)-O(9)           | 2.2034(13) |
| Mn(1)-O(2)#1         | 2.1733(13) | Mn(1)-O(1)#2         | 2.1499(14) |
| Mn(1)-O(9)#2         | 2.2034(13) | Mn(1)-O(2)#3         | 2.1733(13) |
| <b>4</b>             |            |                      |            |
| Mn(1)-O(1)           | 2.109(2)   | Mn(1)-O(13)          | 2.175(2)   |
| Mn(1)-N(1)           | 2.253(2)   | Mn(1)-O(12)#1        | 2.146(2)   |
| Mn(1)-O(7)#2         | 2.363(2)   | Mn(1)-O(11)#3        | 2.135(2)   |
| <b>1</b>             |            |                      |            |
| O(1)-Mn(1)-O(13)     | 91.73(19)  | O(1)-Mn(1)-O(14)     | 87.53(18)  |
| O(1)-Mn(1)-O(6)#1    | 98.35(16)  | O(1)-Mn(1)-O(4)#2    | 91.52(17)  |
| O(1)-Mn(1)-O(9)#2    | 172.46(16) | O(13)-Mn(1)-O(14)    | 93.1(2)    |
| O(6)#1-Mn(1)-O(13)   | 169.41(18) | O(4)#2-Mn(1)-O(13)   | 90.19(19)  |
| O(9)#2-Mn(1)-O(13)   | 81.65(17)  | O(6)#1-Mn(1)-O(14)   | 90.56(15)  |
| O(4)#2-Mn(1)-O(14)   | 176.58(15) | O(9)#2-Mn(1)-O(14)   | 89.25(16)  |
| O(4)#2-Mn(1)-O(6)#1  | 86.32(14)  | O(6)#1-Mn(1)-O(9)#2  | 88.49(13)  |
| O(4)#2-Mn(1)-O(9)#2  | 92.09(14)  | O(2)-Mn(2)-O(15)     | 84.52(19)  |
| O(2)-Mn(2)-O(5)#1    | 86.71(16)  | O(2)-Mn(2)-O(10)#1   | 98.52(17)  |
| O(2)-Mn(2)-O(4)#2    | 91.07(16)  | O(2)-Mn(2)-O(6)#2    | 169.50(16) |
| O(5)#1-Mn(2)-O(15)   | 165.38(17) | O(10)#1-Mn(2)-O(15)  | 88.47(17)  |
| O(4)#2-Mn(2)-O(15)   | 101.19(17) | O(6)#2-Mn(2)-O(15)   | 89.43(18)  |
| O(5)#1-Mn(2)-O(10)#1 | 81.28(14)  | O(4)#2-Mn(2)-O(5)#1  | 90.63(14)  |
| O(5)#1-Mn(2)-O(6)#2  | 100.88(14) | O(4)#2-Mn(2)-O(10)#1 | 167.03(15) |
| O(6)#2-Mn(2)-O(10)#1 | 89.86(13)  | O(4)#2-Mn(2)-O(6)#2  | 81.69(13)  |
| <b>2</b>             |            |                      |            |

## Electronic Supporting Information

|                      |            |                       |            |
|----------------------|------------|-----------------------|------------|
| O(1)-Mn(1)-O(13)     | 89.61(12)  | O(1)-Mn(1)-O(5)#1     | 87.27(11)  |
| O(1)-Mn(1)-O(10)#1   | 100.96(12) | O(1)-Mn(1)-O(4)#2     | 90.21(11)  |
| O(1)-Mn(1)-O(6)#2    | 168.81(12) | O(5)#1-Mn(1)-O(13)    | 163.34(12) |
| O(10)#1-Mn(1)-O(13)  | 83.61(12)  | O(4)#2-Mn(1)-O(13)    | 106.48(12) |
| O(6)#2-Mn(1)-O(13)   | 85.41(11)  | O(5)#1-Mn(1)-O(10)#1  | 80.94(11)  |
| O(4)#2-Mn(1)-O(5)#1  | 89.90(11)  | O(5)#1-Mn(1)-O(6)#2   | 100.30(10) |
| O(4)#2-Mn(1)-O(10)#1 | 165.12(11) | O(6)#2-Mn(1)-O(10)#1  | 88.46(11)  |
| O(4)#2-Mn(1)-O(6)#2  | 81.63(10)  | O(2)-Mn(2)-O(14)      | 87.43(15)  |
| O(2)-Mn(2)-O(17)     | 90.09(12)  | O(2)-Mn(2)-O(6)#1     | 93.88(11)  |
| O(2)-Mn(2)-O(4)#2    | 89.57(11)  | O(2)-Mn(2)-O(9)#2     | 173.78(12) |
| O(14)-Mn(2)-O(17)    | 96.03(14)  | O(6)#1-Mn(2)-O(14)    | 177.14(13) |
| O(4)#2-Mn(2)-O(14)   | 90.20(13)  | O(9)#2-Mn(2)-O(14)    | 86.51(14)  |
| O(6)#1-Mn(2)-O(17)   | 86.52(11)  | O(4)#2-Mn(2)-O(17)    | 173.75(11) |
| O(9)#2-Mn(2)-O(17)   | 89.17(11)  | O(4)#2-Mn(2)-O(6)#1   | 87.28(10)  |
| O(6)#1-Mn(2)-O(9)#2  | 92.24(11)  | O(4)#2-Mn(2)-O(9)#2   | 91.84(11)  |
| <b>3</b>             |            |                       |            |
| O(1)-Mn(1)-O(9)      | 92.02(6)   | O(1)-Mn(1)-O(2)#1     | 95.75(5)   |
| O(1)-Mn(1)-O(1)#2    | 180.00     | O(1)-Mn(1)-O(9)#2     | 87.98(6)   |
| O(1)-Mn(1)-O(2)#3    | 84.25(5)   | O(2)#1-Mn(1)-O(9)     | 90.02(5)   |
| O(1)#2-Mn(1)-O(9)    | 87.98(6)   | O(9)-Mn(1)-O(9)#2     | 180.00     |
| O(2)#3-Mn(1)-O(9)    | 89.98(5)   | O(1)#2-Mn(1)-O(2)#1   | 84.25(5)   |
| O(2)#1-Mn(1)-O(9)#2  | 89.98(5)   | O(2)#1-Mn(1)-O(2)#3   | 180.00     |
| O(1)#2-Mn(1)-O(9)#2  | 92.02(6)   | O(1)#2-Mn(1)-O(2)#3   | 95.75(5)   |
| O(2)#3-Mn(1)-O(9)#2  | 90.02(5)   |                       |            |
| <b>4</b>             |            |                       |            |
| O(1)-Mn(1)-O(13)     | 87.05(10)  | O(1)-Mn(1)-N(1)       | 90.32(9)   |
| O(1)-Mn(1)-O(12)#1   | 165.01(9)  | O(1)-Mn(1)-O(7)#2     | 85.66(8)   |
| O(1)-Mn(1)-O(11)#3   | 91.61(9)   | O(13)-Mn(1)-N(1)      | 177.01(11) |
| O(12)#1-Mn(1)-O(13)  | 84.40(10)  | O(7)#2-Mn(1)-O(13)    | 90.75(10)  |
| O(11)#3-Mn(1)-O(13)  | 92.90(10)  | O(12)_#1-Mn(1)-N(1)   | 97.86(9)   |
| O(7)#2-Mn(1)-N(1)    | 87.63(8)   | O(11)#3-Mn(1)-N(1)    | 88.60(9)   |
| O(7)#2-Mn(1)-O(12)#1 | 82.16(8)   | O(11)#3-Mn(1)-O(12)#1 | 101.09(9)  |
| O(7)#2-Mn(1)-O(11)#3 | 175.33(9)  |                       |            |

Symmetry Codes: **For 1:** #1=1-x, 1/2+y, 3/2-z; #2=x, 3/2-y, -1/2+z; **For 2:** #1=1-x, 1/2+y, 1/2-z; **For 3:** #-x,y,1/2-z; #2=-x,1-y,1-z; #3=x,1-y,1/2+z; **For 4:** #1=-1+x, y, 1+z; #2=x, y, 1+z; #3=1-x, 1-y, 1-z.

**Table S4: Rate constant of the reactions**

## Electronic Supporting Information

---

| Material  | $k$ (min <sup>-1</sup> ) | $R^2$   |
|-----------|--------------------------|---------|
| 1+NFZ     | 0.01912                  | 0.98604 |
| 2+NFZ     | 0.03224                  | 0.98284 |
| 3+NFZ     | 0.01895                  | 0.98506 |
| 4+NFZ     | 0.02121                  | 0.98672 |
| BQ+NFZ-1  | 0.01797                  | 0.99484 |
| AO+NFZ-1  | 0.02212                  | 0.98343 |
| TBA+NFZ-1 | 0.02598                  | 0.96644 |
| 1+CAP     | 0.00211                  | 0.98298 |
| 2+CAP     | 0.00212                  | 0.97502 |
| 3+CAP     | 0.00303                  | 0.98719 |
| 4+CAP     | 0.00968                  | 0.98382 |
| 1+ODZ     | 0.02253                  | 0.98763 |
| 2+ODZ     | 0.02401                  | 0.98645 |
| 3+ODZ     | 0.01761                  | 0.97908 |
| 4+ODZ     | 0.02530                  | 0.98327 |
| 1+OXY     | 0.02075                  | 0.99370 |
| 2+OXY     | 0.01533                  | 0.98010 |
| 3+OXY     | 0.01381                  | 0.99529 |
| 4+OXY     | 0.00557                  | 0.98716 |

---



### Electronic Supporting Information

|       |         |         |
|-------|---------|---------|
| 1+SMT | 0.00655 | 0.98039 |
| 2+SMT | 0.00698 | 0.99164 |
| 3+SMT | 0.00465 | 0.99138 |
| 4+SMT | 0.00706 | 0.99172 |

---

**Table S5: The percentage photodegradation**

|            | <b>Blank</b>  | <b>1</b>      | <b>2</b>      | <b>3</b>      | <b>4</b>      |
|------------|---------------|---------------|---------------|---------------|---------------|
| <b>CAP</b> | <b>18.48%</b> | <b>15.74%</b> | <b>17.63%</b> | <b>16.30%</b> | <b>24.88%</b> |
| <b>NFZ</b> | <b>24.82%</b> | <b>76.29%</b> | <b>91.93%</b> | <b>77.29%</b> | <b>78.61%</b> |
| <b>ODZ</b> | <b>24.67%</b> | <b>78.93%</b> | <b>78.04%</b> | <b>72.05%</b> | <b>80.93%</b> |
| <b>OXY</b> | <b>25.89%</b> | <b>64.97%</b> | <b>62.80%</b> | <b>32.18%</b> | <b>52.99%</b> |
| <b>SMT</b> | <b>49.01%</b> | <b>40.45%</b> | <b>40.25%</b> | <b>34.97%</b> | <b>43.21%</b> |

|                            |                |                |                |
|----------------------------|----------------|----------------|----------------|
| <b>Concentration (NFZ)</b> | <b>20 mg/L</b> | <b>30 mg/L</b> | <b>40 mg/L</b> |
|                            | <b>86.42%</b>  | <b>91.93%</b>  | <b>81.23%</b>  |
| <b>Dosage (CP 2)</b>       | <b>10 mg/L</b> | <b>20 mg/L</b> | <b>30 mg/L</b> |
|                            | <b>86.90%</b>  | <b>91.93%</b>  | <b>81.79%</b>  |
| <b>pH</b>                  | <b>pH=6</b>    | <b>pH=7</b>    | <b>pH=8</b>    |

## Electronic Supporting Information

|  |               |               |               |
|--|---------------|---------------|---------------|
|  | <b>79.55%</b> | <b>91.93%</b> | <b>81.88%</b> |
|--|---------------|---------------|---------------|
